# Supplementary material for: Phytochemical characterization, antimicrobial and antioxidant activities of Terminalia catappa methanol and aqueous extracts
Source: PubMed Central journal article supplement (PMC10986026; doi:10.1186/s12906-024-04449-7), 2024-04-02
Supplement: 12906_2024_4449_MOESM1_ESM.pdf [file 12906_2024_4449_MOESM1_ESM.pdf]

**Supplementary Table 1:** Table showing the average diameter of zones of inhibition of *T. catappa* L. methanol extract (TCM) against five microorganisms

| Sample                   | Mean $\pm$ SD                 |                               |                               |                               |
|--------------------------|-------------------------------|-------------------------------|-------------------------------|-------------------------------|
|                          | <i>S. aureus</i>              | <i>P. aeruginosa</i>          | <i>E. coli</i>                | <i>B. subtilis</i>            |
| 0.15 mg/ml ciprofloxacin | 21.0 $\pm$ 0 <sup>Aa</sup>    | 27.7 $\pm$ 0.33 <sup>Ab</sup> | 25.7 $\pm$ 0.17 <sup>Ac</sup> | 26.3 $\pm$ 0.33 <sup>Ad</sup> |
| 100 mg/ml TCM            | 18.5 $\pm$ 0.29 <sup>Ba</sup> | 25.7 $\pm$ 0.33 <sup>Bb</sup> | 25.0 $\pm$ 0.0 <sup>Ab</sup>  | 14.3 $\pm$ 0.33 <sup>Bc</sup> |
| 50 mg/ml TCM             | 13.7 $\pm$ 0.58 <sup>Ca</sup> | 20.7 $\pm$ 0.33 <sup>Cb</sup> | 20.3 $\pm$ 0.33 <sup>Bb</sup> | 11.3 $\pm$ 0.33 <sup>Cc</sup> |
| 25 mg/ml TCM             | 12.3 $\pm$ 0.33 <sup>Da</sup> | 19.3 $\pm$ 0.33 <sup>Db</sup> | 14.7 $\pm$ 0.33 <sup>Cc</sup> | 10.7 $\pm$ 0.17 <sup>Dd</sup> |
| 5%DMSO                   | 0.0 <sup>Ea</sup>             | 0.0 <sup>Ea</sup>             | 0.0 <sup>Da</sup>             | 0.0 <sup>Ea</sup>             |

<sup>1</sup>

**Supplementary Table 2:** Table showing the average diameter of zones of inhibition of *T. catappa* L. aqueous extract (TCW) against five microorganisms

| Sample                   | Mean $\pm$ SD                 |                               |                               |                               |
|--------------------------|-------------------------------|-------------------------------|-------------------------------|-------------------------------|
|                          | <i>S. aureus</i>              | <i>P. aeruginosa</i>          | <i>E. coli</i>                | <i>B. subtilis</i>            |
| 0.15 mg/ml ciprofloxacin | 21.0 $\pm$ 0 <sup>Aa</sup>    | 27.7 $\pm$ 0.33 <sup>Ab</sup> | 25.7 $\pm$ 0.17 <sup>Ac</sup> | 26.3 $\pm$ 0.33 <sup>Ad</sup> |
| 100 mg/ml TCW            | 15.3 $\pm$ 0.33 <sup>Ba</sup> | 15.7 $\pm$ 0.33 <sup>Ba</sup> | 20.3 $\pm$ 0.33 <sup>Bb</sup> | 19.3 $\pm$ 0.33 <sup>Bb</sup> |
| 50 mg/ml TCW             | 12.7 $\pm$ 0.33 <sup>Ca</sup> | 13.3 $\pm$ 0.33 <sup>Ca</sup> | 17.3 $\pm$ 0.33 <sup>Cb</sup> | 17.3 $\pm$ 0.33 <sup>Cb</sup> |
| 25 mg/ml TCW             | 9.7 $\pm$ 0.33 <sup>Da</sup>  | 10.3 $\pm$ 0.58 <sup>Da</sup> | 14.0 $\pm$ 0.0 <sup>Db</sup>  | 14.3 $\pm$ 0.44 <sup>Db</sup> |
| 5%DMSO                   | 0.0 <sup>Ea</sup>             | 0.0 <sup>Ea</sup>             | 0.0 <sup>Ea</sup>             | 0.0 <sup>Ea</sup>             |

<sup>2</sup>

<sup>1</sup> Mean zones of inhibition expressed as  $\bar{x} \pm$  SD, n=3. Mean values with the same uppercase superscript letter along the columns and lowercase superscript letter across the rows are not significantly different (P>0.05; one-way ANOVA followed by Tukey's paired test).

<sup>2</sup> Mean zones of inhibition expressed as  $\bar{x} \pm$  SD, n=3. Mean values with the same uppercase superscript letter along the columns and lowercase superscript letter across the rows are not significantly different (P>0.05; one-way ANOVA followed by Tukey's paired test).
